# Supplementary material
Source: PubMed Central journal article supplement (PMC2696176)
Supplement: halms291635-supplement_1.pdf [file halms291635-supplement_1.pdf]

Supplementary tables – sensitivity analyses for reviewers and potentially on-line access

TABLE 2A Odds ratios for **staying disease** free at Phase 7 associated with demographic factors, early life factors, health behaviors and psychosocial factors at Phase 1

|                                    | Men<br>(2549 with no disease / 4140 men) |                      |                    | Women<br>(988 with no disease / 1683 women) |                      |                    |
|------------------------------------|------------------------------------------|----------------------|--------------------|---------------------------------------------|----------------------|--------------------|
|                                    | N                                        | Odds ratio* (95% CI) |                    | N                                           | Odds ratio* (95% CI) |                    |
|                                    |                                          | Age adjusted         | Age & SEP adjusted |                                             | Age Adjusted         | Age & SEP adjusted |
| <b>Socio-economic Position</b>     |                                          |                      |                    |                                             |                      |                    |
| Employment grade - High            | 1728                                     | 1.51 (1.1, 2.0)      |                    | 272                                         | 1.60 (1.2, 2.2)      |                    |
| - Medium                           | 2197                                     | 1.30 (1.0, 1.7)      |                    | 753                                         | 1.36 (1.1, 1.7)      |                    |
| - Low                              | 215                                      | 1.0                  |                    | 658                                         | 1.0                  |                    |
| <i>P-value for trend</i>           |                                          | 0.06                 |                    |                                             | <0.001               |                    |
| <b>Early Life Factors</b>          |                                          |                      |                    |                                             |                      |                    |
| Father's social class - Non manual | 2448                                     | 0.95 (0.8, 1.1)      | 0.93 (0.8, 1.1)    | 849                                         | 1.27 (1.3, 2.5)      | 1.18 (0.9, 1.5)    |
| - Manual                           | 1465                                     | 1.0                  | 1.0                | 667                                         | 1.0                  | 1.0                |
| <i>P-value</i>                     |                                          | 0.47                 | 0.29               |                                             | 0.03                 | 0.14               |
| Age left Education - > 18 yrs      | 1862                                     | 1.16 (1.0, 1.4)      | 1.08 (0.9, 1.3)    | 533                                         | 1.27 (1.0, 1.6)      | 1.05 (0.8, 1.4)    |
| - 17 - 18 yrs                      | 1033                                     | 1.12 (0.9, 1.3)      | 1.08 (0.9, 1.3)    | 366                                         | 1.11 (0.9, 1.4)      | 1.00 (0.8, 1.3)    |
| - ≤ 16 yrs                         | 1094                                     | 1.0                  | 1.0                | 688                                         | 1.0                  | 1.0                |
| <i>P-value for trend</i>           |                                          | 0.06                 | 0.40               |                                             | 0.06                 | 0.72               |
| Height tertiles - Tallest          | 1442                                     | 1.24 (1.1, 1.4)      | 1.20 (1.0, 1.4)    | 615                                         | 1.34 (1.1, 1.7)      | 1.22 (1.0, 1.6)    |
| - Middle                           | 1408                                     | 1.25 (1.1, 1.5)      | 1.22 (1.0, 1.4)    | 575                                         | 1.31 (1.0, 1.7)      | 1.25 (1.0, 1.6)    |
| - Shortest                         | 1286                                     | 1.0                  | 1.0                | 493                                         | 1.0                  | 1.0                |
| <i>P-value for trend</i>           |                                          | 0.008                | 0.03               |                                             | 0.02                 | 0.13               |
| <b>Health behaviors</b>            |                                          |                      |                    |                                             |                      |                    |
| Smoking habit - Never              | 2079                                     | 1.51 (1.2, 1.8)      | 1.47 (1.2, 1.8)    | 969                                         | 1.65 (1.3, 2.2)      | 1.64 (1.3, 2.1)    |
| - Ex                               | 1520                                     | 1.23 (1.0, 1.5)      | 1.20 (1.0, 1.5)    | 411                                         | 1.64 (1.2, 2.2)      | 1.58 (1.2, 2.1)    |
| - Current                          | 509                                      | 1.0                  | 1.0                | 292                                         | 1.0                  | 1.0                |
| <i>P-value for trend</i>           |                                          | <0.001               | <0.001             |                                             | 0.001                | 0.001              |
| Alcohol - None                     | 429                                      | 0.97 (0.8, 1.2)      | 1.02 (0.8, 1.3)    | 405                                         | 0.63 (0.5, 1.1)      | 0.75 (0.5, 1.1)    |
| - 1-14                             | 2401                                     | 1.15 (1.0, 1.3)      | 1.16 (1.0, 1.3)    | 1083                                        | 0.90 (0.6, 1.3)      | 0.99 (0.7, 1.4)    |
| - 15+                              | 1280                                     | 1.0                  | 1.0                | 175                                         | 1.0                  | 1.0                |
| <i>P-value for trend</i>           |                                          | 0.52                 | 0.31               |                                             | 0.003                | 0.05               |
| Poor Diet - No                     | 2226                                     | 1.18 (1.0, 1.3)      | 1.16 (1.0, 1.3)    | 1024                                        | 1.12 (0.9, 1.4)      | 1.03 (0.8, 1.3)    |
| - Yes                              | 1799                                     | 1.0                  | 1.0                | 570                                         | 1.0                  | 1.0                |
| <i>P-value</i>                     |                                          | 0.01                 | 0.03               |                                             | 0.30                 | 0.78               |
| Physical activity - Vigorous       | 2254                                     | 1.87 (1.5, 2.3)      | 1.79 (1.4, 2.3)    | 485                                         | 1.28 (1.0, 1.7)      | 1.18 (0.9, 1.6)    |
| - Moderate                         | 1508                                     | 1.51 (1.2, 1.9)      | 1.46 (1.2, 1.8)    | 771                                         | 1.11 (0.9, 1.4)      | 1.05 (0.8, 1.3)    |
| - None / mild                      | 364                                      | 1.0                  | 1.0                | 412                                         | 1.0                  | 1.0                |
| <i>P-value for trend</i>           |                                          | <0.001               | <0.001             |                                             | 0.07                 | 0.23               |
| <b>Psychosocial factors</b>        |                                          |                      |                    |                                             |                      |                    |
| Decision latitude - High           | 1789                                     | 1.22 (1.0, 1.4)      | 1.12 (0.9, 1.3)    | 393                                         | 1.31 (1.0, 1.7)      | 1.10 (0.8, 1.5)    |
| - Medium                           | 1417                                     | 1.13 (1.0, 1.3)      | 1.06 (0.9, 1.3)    | 517                                         | 1.10 (0.9, 1.4)      | 0.99 (0.8, 1.3)    |
| - Low                              | 918                                      | 1.0                  | 1.0                | 741                                         | 1.0                  | 1.0                |
| <i>P-value for trend</i>           |                                          | 0.02                 | 0.22               |                                             | 0.04                 | 0.55               |
| Job demands - Low                  | 932                                      | 0.97 (0.8, 1.2)      | 1.05 (0.9, 1.3)    | 596                                         | 1.14 (0.9, 1.5)      | 1.44 (1.1, 1.9)    |
| - Medium                           | 1838                                     | 1.02 (0.9, 1.2)      | 1.06 (0.9, 1.2)    | 710                                         | 1.17 (0.9, 1.5)      | 1.31 (1.0, 1.7)    |
| - High                             | 1361                                     | 1.0                  | 1.0                | 360                                         | 1.0                  | 1.0                |
| <i>P-value for trend</i>           |                                          | 0.78                 | 0.54               |                                             | 0.40                 | 0.02               |
| Work support - High                | 1410                                     | 1.23 (1.0, 1.4)      | 1.21 (1.0, 1.4)    | 528                                         | 1.13 (0.9, 1.4)      | 1.12 (0.9, 1.4)    |
| - Medium                           | 1393                                     | 0.93 (0.8, 1.1)      | 0.91 (0.8, 1.1)    | 502                                         | 1.08 (0.9, 1.4)      | 1.05 (0.8, 1.3)    |
| - Low                              | 1322                                     | 1.0                  | 1.0                | 635                                         | 1.0                  | 1.0                |
| <i>P-value for trend</i>           |                                          | 0.01                 | 0.01               |                                             | 0.32                 | 0.34               |
| Network Index - High               | 1571                                     | 1.06 (0.9, 1.2)      | 1.04 (0.9, 1.2)    | 560                                         | 0.95 (0.7, 1.2)      | 0.93 (0.7, 1.2)    |
| - Medium                           | 1510                                     | 1.11 (0.9, 1.3)      | 1.10 (0.9, 1.3)    | 631                                         | 0.90 (0.7, 1.1)      | 0.88 (0.7, 1.1)    |
| - Low                              | 1026                                     | 1.0                  | 1.0                | 470                                         | 1.0                  | 1.0                |
| <i>P-value for trend</i>           |                                          | 0.56                 | 0.71               |                                             | 0.70                 | 0.63               |

\* All odds ratios are adjusted for number of phases attended in addition to adjustments given

TABLE 2B. Odds ratios for **good functioning** at Phase 7 associated with demographic factors, early life factors, health behaviors and psychosocial factors at Phase 1

|                                    | <b>Men</b><br>(757 good functioning / 4140 men) |                      |                    | <b>Women</b><br>(361 good functioning / 1683 women) |                      |                    |
|------------------------------------|-------------------------------------------------|----------------------|--------------------|-----------------------------------------------------|----------------------|--------------------|
|                                    | N                                               | Odds ratio* (95% CI) |                    | N                                                   | Odds ratio* (95% CI) |                    |
|                                    |                                                 | Age adjusted         | Age & SEP adjusted |                                                     | Age Adjusted         | Age & SEP adjusted |
| <b>Socio-economic Position</b>     |                                                 |                      |                    |                                                     |                      |                    |
| Employment grade - High            | 1728                                            | 11.0 (5.3, 22.7)     |                    | 272                                                 | 9.22 (6.2, 13.7)     |                    |
| - Medium                           | 2197                                            | 4.53 (2.2, 9.3)      |                    | 753                                                 | 3.55 (2.5, 5.0)      |                    |
| - Low                              | 215                                             | 1.0                  |                    | 658                                                 | 1.0                  |                    |
| <i>P-value for trend</i>           |                                                 | <0.001               |                    |                                                     | <0.001               |                    |
| <b>Early Life Factors</b>          |                                                 |                      |                    |                                                     |                      |                    |
| Father's social class - Non manual | 2448                                            | 1.17 (1.0, 1.4)      | 1.03 (0.9, 1.2)    | 849                                                 | 1.87 (1.4, 2.5)      | 1.23 (0.9, 1.6)    |
| - Manual                           | 1465                                            | 1.0                  | 1.0                | 667                                                 | 1.0                  | 1.0                |
| <i>P-value</i>                     |                                                 | 0.08                 | 0.79               |                                                     | <0.001               | 0.18               |
| Age left Education - > 18 yrs      | 1862                                            | 2.18 (1.7, 2.7)      | 1.43 (1.1, 1.8)    | 533                                                 | 2.57 (1.9, 3.5)      | 1.19 (0.8, 1.7)    |
| - 17 - 18 yrs                      | 1033                                            | 1.71 (1.3, 2.2)      | 1.43 (1.1, 1.8)    | 366                                                 | 1.62 (1.1, 2.3)      | 1.06 (0.7, 1.5)    |
| - ≤ 16 yrs                         | 1094                                            | 1.0                  | 1.0                | 688                                                 | 1.0                  | 1.0                |
| <i>P-value for trend</i>           |                                                 | <0.001               | 0.009              |                                                     | <0.001               | 0.33               |
| Height tertiles - Tallest          | 1442                                            | 2.21 (1.8, 2.7)      | 1.92 (1.5, 2.4)    | 615                                                 | 2.69 (1.9, 3.7)      | 1.84 (1.3, 2.6)    |
| - Middle                           | 1408                                            | 1.60 (1.3, 2.0)      | 1.48 (1.2, 1.9)    | 575                                                 | 1.66 (1.2, 2.4)      | 1.34 (0.9, 1.9)    |
| - Shortest                         | 1286                                            | 1.0                  | 1.0                | 493                                                 | 1.0                  | 1.0                |
| <i>P-value for trend</i>           |                                                 | <0.001               | <0.001             |                                                     | <0.001               | <0.001             |
| <b>Health behaviors</b>            |                                                 |                      |                    |                                                     |                      |                    |
| Smoking habit - Never              | 2079                                            | 2.41 (1.8, 3.3)      | 2.06 (1.5, 2.8)    | 969                                                 | 1.78 (1.2, 2.6)      | 1.65 (1.1, 2.5)    |
| - Ex                               | 1520                                            | 2.11 (1.5, 2.9)      | 1.95 (1.4, 2.7)    | 411                                                 | 2.40 (1.6, 3.7)      | 1.95 (1.2, 3.0)    |
| - Current                          | 509                                             | 1.0                  | 1.0                | 292                                                 | 1.0                  | 1.0                |
| <i>P-value for trend</i>           |                                                 | <0.001               | <0.001             |                                                     | 0.08                 | 0.09               |
| Alcohol - None                     | 429                                             | 0.78 (0.6, 1.1)      | 1.00 (0.4, 1.4)    | 405                                                 | 0.34 (0.2, 0.5)      | 0.72 (0.4, 1.2)    |
| - 1-14                             | 2401                                            | 0.95 (0.8, 1.1)      | 0.96 (0.8, 1.2)    | 1083                                                | 0.78 (0.5, 1.1)      | 1.12 (0.8, 1.6)    |
| - 15+                              | 1280                                            | 1.0                  | 1.0                | 175                                                 | 1.0                  | 1.0                |
| <i>P-value for trend</i>           |                                                 | 0.15                 | 0.82               |                                                     | <0.001               | 0.13               |
| Poor Diet - No                     | 2226                                            | 1.34 (1.1, 1.6)      | 1.20 (1.0, 1.4)    | 1024                                                | 1.64 (1.2, 2.1)      | 1.16 (0.9, 1.6)    |
| - Yes                              | 1799                                            | 1.0                  | 1.0                | 570                                                 | 1.0                  | 1.0                |
| <i>P-value</i>                     |                                                 | <0.001               | 0.04               |                                                     | 0.008                | 0.32               |
| Physical activity - Vigorous       | 2254                                            | 1.82 (1.3, 2.6)      | 1.42 (1.0, 2.0)    | 485                                                 | 2.72 (1.9, 4.0)      | 2.06 (1.4, 3.1)    |
| - Moderate                         | 1508                                            | 1.58 (1.1, 2.3)      | 1.29 (0.9, 1.9)    | 771                                                 | 2.01 (1.4, 2.9)      | 1.68 (1.1, 2.5)    |
| - None / mild                      | 364                                             | 1.0                  | 1.0                | 412                                                 | 1.0                  | 1.0                |
| <i>P-value for trend</i>           |                                                 | <0.001               | 0.05               |                                                     | <0.001               | <0.001             |
| <b>Psychosocial factors</b>        |                                                 |                      |                    |                                                     |                      |                    |
| Decision latitude - High           | 1789                                            | 1.91 (1.5, 2.4)      | 1.18 (0.9, 1.5)    | 393                                                 | 3.06 (2.2, 4.2)      | 1.40 (1.0, 2.0)    |
| - Medium                           | 1417                                            | 1.43 (1.1, 1.8)      | 1.05 (0.8, 1.3)    | 517                                                 | 1.99 (1.5, 2.7)      | 1.29 (0.9, 1.8)    |
| - Low                              | 918                                             | 1.0                  | 1.0                | 741                                                 | 1.0                  | 1.0                |
| <i>P-value for trend</i>           |                                                 | <0.001               | 0.14               |                                                     | <0.001               | 0.07               |
| Job demands - Low                  | 932                                             | 0.77 (0.6, 1.0)      | 1.12 (0.9, 1.4)    | 596                                                 | 0.52 (0.4, 0.7)      | 1.16 (0.8, 1.7)    |
| - Medium                           | 1838                                            | 1.03 (0.9, 1.2)      | 1.24 (1.0, 1.5)    | 710                                                 | 0.80 (0.6, 1.1)      | 1.15 (0.8, 1.6)    |
| - High                             | 1361                                            | 1.0                  | 1.0                | 360                                                 | 1.0                  | 1.0                |
| <i>P-value for trend</i>           |                                                 | 0.04                 | 0.20               |                                                     | <0.001               | 0.43               |
| Work support - High                | 1410                                            | 1.21 (1.0, 1.5)      | 1.17 (1.0, 1.4)    | 528                                                 | 1.17 (0.9, 1.6)      | 1.10 (0.8, 1.5)    |
| - Medium                           | 1393                                            | 1.12 (0.9, 1.4)      | 1.04 (0.8, 1.3)    | 502                                                 | 1.07 (0.8, 1.5)      | 0.92 (0.7, 1.3)    |
| - Low                              | 1322                                            | 1.0                  | 1.0                | 635                                                 | 1.0                  | 1.0                |
| <i>P-value for trend</i>           |                                                 | 0.06                 | 0.14               |                                                     | 0.30                 | 0.58               |
| Network Index - High               | 1571                                            | 1.17 (0.9, 1.4)      | 1.08 (0.9, 1.3)    | 560                                                 | 0.98 (0.7, 1.3)      | 0.92 (0.7, 1.3)    |
| - Medium                           | 1510                                            | 1.04 (0.8, 1.3)      | 0.98 (0.8, 1.2)    | 631                                                 | 0.99 (0.7, 1.3)      | 0.87 (0.6, 1.2)    |
| - Low                              | 1026                                            | 1.0                  | 1.0                | 470                                                 | 1.0                  | 1.0                |
| <i>P-value for trend</i>           |                                                 | 0.11                 | 0.38               |                                                     | 0.91                 | 0.65               |

\* All odds ratios are adjusted for number of phases attended in addition to adjustments given

TABLE 2C. Odds ratios for successful aging at Phase 7 associated with demographic factors, early life factors, health behaviors and psychosocial factors at Phase 1

**NOTE: Disease definition EXCLUDES Metabolic syndrome from disease definition**

|                                    | Men<br>(627 successfully aged / 4140 men) |                      |                    | Women<br>(267 successfully aged / 1683 women) |                      |                    |
|------------------------------------|-------------------------------------------|----------------------|--------------------|-----------------------------------------------|----------------------|--------------------|
|                                    | N                                         | Odds ratio* (95% CI) |                    | N                                             | Odds ratio* (95% CI) |                    |
|                                    |                                           | Age adjusted         | Age & SEP adjusted |                                               | Age adjusted         | Age & SEP adjusted |
| <b>Socio-economic Position</b>     |                                           |                      |                    |                                               |                      |                    |
| Employment grade - High            | 1728                                      | 8.54 (4.1, 17.6)     |                    | 272                                           | 8.34 (5.3, 13.1)     |                    |
| - Medium                           | 2197                                      | 3.59 (1.7, 7.4)      |                    | 753                                           | 3.92 (2.6, 5.9)      |                    |
| - Low                              | 215                                       | 1.0                  |                    | 658                                           | 1.0                  |                    |
| <i>P-value for trend</i>           |                                           | <0.001               |                    |                                               | <0.001               |                    |
| <b>Early Life Factors</b>          |                                           |                      |                    |                                               |                      |                    |
| Father's social class - Non manual | 2448                                      | 1.10 (0.9, 1.3)      | 0.97 (0.8, 1.2)    | 849                                           | 1.79 (1.3, 2.4)      | 1.21 (0.9, 1.7)    |
| - Manual                           | 1465                                      | 1.0                  | 1.0                | 667                                           | 1.0                  | 1.0                |
| <i>P-value</i>                     |                                           | 0.30                 | 0.75               |                                               | <0.001               | 0.24               |
| Age left Education - > 18 yrs      | 1862                                      | 1.95 (1.5, 2.5)      | 1.27 (1.0, 1.6)    | 533                                           | 2.42 (1.7, 3.4)      | 1.17 (0.8, 1.7)    |
| - 17 - 18 yrs                      | 1033                                      | 1.51 (1.1, 2.0)      | 1.26 (1.0, 1.7)    | 366                                           | 1.72 (1.2, 2.5)      | 1.14 (0.8, 1.7)    |
| - ≤ 16 yrs                         | 1094                                      | 1.0                  | 1.0                | 688                                           | 1.0                  | 1.0                |
| <i>P-value for trend</i>           |                                           | <0.001               | 0.09               |                                               | <0.001               | 0.45               |
| Height tertiles - Tallest          | 1442                                      | 2.07 (1.7, 2.6)      | 1.80 (1.4, 2.3)    | 615                                           | 2.96 (2.0, 4.3)      | 2.07 (1.4, 3.1)    |
| - Middle                           | 1408                                      | 1.53 (1.2, 1.9)      | 1.42 (1.1, 1.8)    | 575                                           | 1.85 (1.2, 2.8)      | 1.50 (1.0, 2.3)    |
| - Shortest                         | 1286                                      | 1.0                  | 1.0                | 493                                           | 1.0                  | 1.0                |
| <i>P-value for trend</i>           |                                           | <0.001               | <0.001             |                                               | <0.001               | <0.001             |
| <b>Health behaviors</b>            |                                           |                      |                    |                                               |                      |                    |
| Smoking habit - Never              | 2079                                      | 2.71 (1.9, 3.8)      | 2.34 (1.6, 3.3)    | 969                                           | 2.22 (1.4, 3.5)      | 2.09 (1.3, 3.4)    |
| - Ex                               | 1520                                      | 2.32 (1.6, 3.3)      | 2.16 (1.5, 3.1)    | 411                                           | 2.52 (1.5, 4.2)      | 2.06 (1.2, 3.5)    |
| - Current                          | 509                                       | 1.0                  | 1.0                | 292                                           | 1.0                  | 1.0                |
| <i>P-value for trend</i>           |                                           | <0.001               | <0.001             |                                               | 0.009                | 0.009              |
| Alcohol - None                     | 429                                       | 0.92 (0.7, 1.3)      | 1.18 (0.9, 1.6)    | 405                                           | 0.30 (0.2, 0.5)      | 0.59 (0.3, 1.0)    |
| - 1-14                             | 2401                                      | 0.94 (0.8, 1.1)      | 0.95 (0.8, 1.2)    | 1083                                          | 0.81 (0.5, 1.2)      | 1.11 (0.7, 1.7)    |
| - 15+                              | 1280                                      | 1.0                  | 1.0                | 175                                           | 1.0                  | 1.0                |
| <i>P-value for trend</i>           |                                           | 0.52                 | 0.66               |                                               | <0.001               | 0.04               |
| Poor Diet - No                     | 2226                                      | 1.47 (1.2, 1.8)      | 1.32 (1.1, 1.6)    | 1024                                          | 1.61 (1.2, 2.2)      | 1.15 (0.8, 1.6)    |
| - Yes                              | 1799                                      | 1.0                  | 1.0                | 570                                           | 1.0                  | 1.0                |
| <i>P-value</i>                     |                                           | <0.001               | 0.004              |                                               | 0.003                | 0.41               |
| Physical activity - Vigorous       | 2254                                      | 1.96 (1.3, 2.9)      | 1.57 (1.1, 2.3)    | 485                                           | 2.37 (1.6, 3.6)      | 1.76 (1.1, 2.7)    |
| - Moderate                         | 1508                                      | 1.57 (1.1, 2.3)      | 1.30 (0.9, 2.0)    | 771                                           | 1.88 (1.3, 2.8)      | 1.53 (1.0, 2.3)    |
| - None / mild                      | 364                                       | 1.0                  | 1.0                | 412                                           | 1.0                  | 1.0                |
| <i>P-value for trend</i>           |                                           | <0.001               | 0.007              |                                               | <0.001               | 0.02               |
| <b>Psychosocial factors</b>        |                                           |                      |                    |                                               |                      |                    |
| Decision latitude - High           | 1789                                      | 1.95 (1.5, 2.5)      | 1.25 (1.0, 1.6)    | 393                                           | 2.67 (1.9, 3.8)      | 1.27 (0.9, 1.9)    |
| - Medium                           | 1417                                      | 1.39 (1.1, 1.8)      | 1.06 (0.8, 1.4)    | 517                                           | 1.93 (1.4, 2.7)      | 1.25 (0.9, 1.8)    |
| - Low                              | 918                                       | 1.0                  | 1.0                | 741                                           | 1.0                  | 1.0                |
| <i>P-value for trend</i>           |                                           | <0.001               | 0.06               |                                               | <0.001               | 0.24               |
| Job demands - Low                  | 932                                       | 0.83 (0.6, 1.1)      | 1.20 (0.9, 1.5)    | 596                                           | 0.63 (0.4, 0.9)      | 1.38 (0.9, 2.1)    |
| - Medium                           | 1838                                      | 1.07 (0.9, 1.3)      | 1.28 (1.0, 1.6)    | 710                                           | 1.00 (0.7, 1.4)      | 1.40 (1.0, 2.0)    |
| - High                             | 1361                                      | 1.0                  | 1.0                | 360                                           | 1.0                  | 1.0                |
| <i>P-value for trend</i>           |                                           | 0.20                 | 0.09               |                                               | 0.01                 | 0.13               |
| Work support - High                | 1410                                      | 1.22 (1.0, 1.5)      | 1.17 (0.9, 1.5)    | 528                                           | 1.16 (0.8, 1.6)      | 1.09 (0.8, 1.5)    |
| - Medium                           | 1393                                      | 1.00 (0.8, 1.2)      | 0.93 (0.7, 1.2)    | 502                                           | 1.06 (0.8, 1.5)      | 0.93 (0.7, 1.3)    |
| - Low                              | 1322                                      | 1.0                  | 1.0                | 635                                           | 1.0                  | 1.0                |
| <i>P-value for trend</i>           |                                           | 0.06                 | 0.13               |                                               | 0.37                 | 0.61               |
| Network Index - High               | 1571                                      | 1.13 (0.9, 1.4)      | 1.05 (0.8, 1.3)    | 560                                           | 1.02 (0.7, 1.4)      | 0.97 (0.7, 1.4)    |
| - Medium                           | 1510                                      | 1.01 (0.8, 1.3)      | 0.95 (0.8, 1.2)    | 631                                           | 1.05 (0.7, 1.5)      | 0.94 (0.7, 1.3)    |
| - Low                              | 1026                                      | 1.0                  | 1.0                | 470                                           | 1.0                  | 1.0                |
| <i>P-value for trend</i>           |                                           | 0.23                 | 0.57               |                                               | 0.95                 | 0.87               |

\* All odds ratios are adjusted for number of phases attended in addition to adjustments given

TABLE 2D. Odds ratios for successful aging at Phase 7 associated with demographic factors, early life factors, health behaviors and psychosocial factors at Phase 1

**NOTE: Functioning definition EXCLUDES the AH4-I cognitive test. Good functioning is defined as being in the top tertile of functioning for two or more of the three functioning measures (or the top tertile of both functioning measures when only two are known).**

|                                    | Men<br>(759 successfully aged / 3170 men) |                      |                    | Women<br>(333 successfully aged / 1365 women) |                      |                    |
|------------------------------------|-------------------------------------------|----------------------|--------------------|-----------------------------------------------|----------------------|--------------------|
|                                    | N                                         | Odds ratio* (95% CI) |                    | N                                             | Odds ratio* (95% CI) |                    |
|                                    |                                           | Age adjusted         | Age & SEP adjusted |                                               | Age adjusted         | Age & SEP adjusted |
| <b>Socio-economic Position</b>     |                                           |                      |                    |                                               |                      |                    |
| Employment grade - High            | 1361                                      | 3.13 (1.9, 5.1)      |                    | 231                                           | 2.54 (1.7, 3.7)      |                    |
| - Medium                           | 1653                                      | 1.80 (1.1, 2.9)      |                    | 637                                           | 2.11 (1.5, 2.9)      |                    |
| - Low                              | 156                                       | 1.0                  |                    | 497                                           | 1.0                  |                    |
| <i>P-value for trend</i>           |                                           | <i>&lt;0.001</i>     |                    |                                               | <i>&lt;0.001</i>     |                    |
| <b>Early Life Factors</b>          |                                           |                      |                    |                                               |                      |                    |
| Father's social class - Non manual | 1893                                      | 0.94 (0.8, 1.1)      | 0.86 (0.7, 1.0)    | 696                                           | 1.38 (1.1, 1.8)      | 1.16 (0.9, 1.5)    |
| - Manual                           | 1100                                      | 1.0                  | 1.0                | 545                                           | 1.0                  | 1.0                |
| <i>P-value</i>                     |                                           | <i>0.46</i>          | <i>0.10</i>        |                                               | <i>0.02</i>          | <i>0.33</i>        |
| Age left Education - > 18 yrs      | 1434                                      | 1.31 (1.1, 1.6)      | 0.96 (0.8, 1.2)    | 446                                           | 1.39 (1.0, 1.9)      | 0.97 (0.7, 1.4)    |
| - 17 - 18 yrs                      | 786                                       | 1.18 (0.9, 1.5)      | 1.03 (0.8, 1.3)    | 301                                           | 1.17 (0.8, 1.7)      | 0.93 (0.6, 1.3)    |
| - ≤ 16 yrs                         | 831                                       | 1.0                  | 1.0                | 551                                           | 1.0                  | 1.0                |
| <i>P-value for trend</i>           |                                           | <i>0.01</i>          | <i>0.66</i>        |                                               | <i>0.04</i>          | <i>0.89</i>        |
| Height tertiles - Tallest          | 1101                                      | 2.03 (1.6, 2.5)      | 1.86 (1.5, 2.3)    | 510                                           | 2.61 (1.8, 3.7)      | 2.24 (1.6, 3.2)    |
| - Middle                           | 1113                                      | 1.66 (1.3, 2.1)      | 1.59 (1.3, 2.0)    | 465                                           | 1.99 (1.4, 2.8)      | 1.80 (1.2, 2.6)    |
| - Shortest                         | 953                                       | 1.0                  | 1.0                | 390                                           | 1.0                  | 1.0                |
| <i>P-value for trend</i>           |                                           | <i>&lt;0.001</i>     | <i>&lt;0.001</i>   |                                               | <i>&lt;0.001</i>     | <i>&lt;0.001</i>   |
| <b>Health behaviors</b>            |                                           |                      |                    |                                               |                      |                    |
| Smoking habit - Never              | 2618                                      | 2.78 (2.0, 3.9)      | 2.53 (1.8, 3.5)    | 778                                           | 1.71 (1.1, 2.5)      | 1.67 (1.1, 2.5)    |
| - Ex                               | 1163                                      | 2.28 (1.6, 3.2)      | 2.18 (1.5, 3.1)    | 344                                           | 1.99 (1.3, 3.1)      | 1.82 (1.2, 2.8)    |
| - Current                          | 361                                       | 1.0                  | 1.0                | 235                                           | 1.0                  | 1.0                |
| <i>P-value for trend</i>           |                                           | <i>&lt;0.001</i>     | <i>&lt;0.001</i>   |                                               | <i>0.05</i>          | <i>0.05</i>        |
| Alcohol - None                     | 327                                       | 1.05 (0.8, 1.4)      | 1.22 (0.9, 1.7)    | 304                                           | 0.38 (0.2, 0.6)      | 0.52 (0.3, 0.8)    |
| - 1-14                             | 1873                                      | 1.26 (1.0, 1.5)      | 1.28 (1.1, 1.6)    | 890                                           | 0.82 (0.6, 1.2)      | 0.95 (0.6, 1.4)    |
| - 15+                              | 949                                       | 1.0                  | 1.0                | 154                                           | 1.0                  | 1.0                |
| <i>P-value for trend</i>           |                                           | <i>0.21</i>          | <i>0.04</i>        |                                               | <i>&lt;0.001</i>     | <i>0.004</i>       |
| Poor Diet - No                     | 1752                                      | 1.42 (1.2, 1.7)      | 1.35 (1.1, 1.6)    | 853                                           | 1.20 (0.9, 1.6)      | 1.02 (0.8, 1.4)    |
| - Yes                              | 1332                                      | 1.0                  | 1.0                | 448                                           | 1.0                  | 1.0                |
| <i>P-value</i>                     |                                           | <i>&lt;0.001</i>     | <i>&lt;0.001</i>   |                                               | <i>0.21</i>          | <i>0.92</i>        |
| Physical activity - Vigorous       | 1784                                      | 1.78 (1.2, 2.5)      | 1.53 (1.1, 2.2)    | 426                                           | 1.61 (1.1, 2.3)      | 1.37 (0.9, 2.0)    |
| - Moderate                         | 1123                                      | 1.41 (1.0, 2.0)      | 1.24 (0.9, 1.8)    | 625                                           | 1.21 (0.9, 1.7)      | 1.08 (0.8, 1.5)    |
| - None / mild                      | 255                                       | 1.0                  | 1.0                | 316                                           | 1.0                  | 1.0                |
| <i>P-value for trend</i>           |                                           | <i>&lt;0.001</i>     | <i>0.003</i>       |                                               | <i>0.007</i>         | <i>0.07</i>        |
| <b>Psychosocial factors</b>        |                                           |                      |                    |                                               |                      |                    |
| Decision latitude - High           | 1384                                      | 1.58 (1.3, 2.0)      | 1.20 (0.9, 1.5)    | 324                                           | 1.76 (1.3, 2.4)      | 1.27 (0.9, 1.8)    |
| - Medium                           | 1098                                      | 1.19 (0.9, 1.5)      | 1.00 (0.8, 1.3)    | 441                                           | 1.65 (1.2, 2.2)      | 1.34 (1.0, 1.9)    |
| - Low                              | 677                                       | 1.0                  | 1.0                | 575                                           | 1.0                  | 1.0                |
| <i>P-value for trend</i>           |                                           | <i>&lt;0.001</i>     | <i>0.08</i>        |                                               | <i>&lt;0.001</i>     | <i>0.19</i>        |
| Job demands - Low                  | 704                                       | 1.04 (0.8, 1.3)      | 1.33 (1.0, 1.7)    | 466                                           | 0.87 (0.6, 1.2)      | 1.29 (0.9, 1.9)    |
| - Medium                           | 1405                                      | 1.09 (0.9, 1.3)      | 1.23 (1.0, 1.5)    | 578                                           | 1.12 (0.8, 1.5)      | 1.31 (0.9, 1.8)    |
| - High                             | 1052                                      | 1.0                  | 1.0                | 308                                           | 1.0                  | 1.0                |
| <i>P-value for trend</i>           |                                           | <i>0.65</i>          | <i>0.01</i>        |                                               | <i>0.35</i>          | <i>0.21</i>        |
| Work support - High                | 1104                                      | 1.38 (1.1, 1.7)      | 1.35 (1.1, 1.7)    | 430                                           | 1.13 (0.8, 1.5)      | 1.11 (0.8, 1.5)    |
| - Medium                           | 1077                                      | 1.15 (0.9, 1.4)      | 1.10 (0.9, 1.4)    | 414                                           | 0.99 (0.7, 1.4)      | 0.94 (0.7, 1.3)    |
| - Low                              | 979                                       | 1.0                  | 1.0                | 506                                           | 1.0                  | 1.0                |
| <i>P-value for trend</i>           |                                           | <i>0.002</i>         | <i>0.005</i>       |                                               | <i>0.46</i>          | <i>0.54</i>        |
| Network Index - High               | 1224                                      | 1.07 (0.9, 1.3)      | 1.01 (0.8, 1.3)    | 453                                           | 0.74 (0.5, 1.0)      | 0.72 (0.5, 1.0)    |
| - Medium                           | 1142                                      | 1.03 (0.8, 1.3)      | 0.99 (0.8, 1.2)    | 530                                           | 0.71 (0.5, 1.0)      | 0.67 (0.5, 0.9)    |
| - Low                              | 776                                       | 1.0                  | 1.0                | 368                                           | 1.0                  | 1.0                |
| <i>P-value for trend</i>           |                                           | <i>0.53</i>          | <i>0.89</i>        |                                               | <i>0.08</i>          | <i>0.07</i>        |

\*All odds ratios are adjusted for number of phases attended in addition to adjustments given
